# Supplementary material for: Theoretical Evaluation of Potential Cytotoxicity of Graphene Quantum Dot to Adsorbed DNA
Source: MDPI journal article supplement (doi:10.3390/ma15217435), 2022-10-23
Supplement: s1 [file s1]

# Support Information

## Theoretical Evaluation of Potential Cytotoxicity of Graphene Quantum Dot to Adsorbed DNA

Lijun Liang <sup>1,2,†</sup>, Xin Shen <sup>3,4,†</sup>, Mengdi Zhou <sup>3</sup>, Yijian Chen <sup>3,4</sup>, Xudong Lu <sup>3,4</sup>, Li Zhang <sup>5,\*</sup>, Wei Wang <sup>6,\*</sup> and Jia-Wei Shen <sup>3,4,\*</sup>

<sup>1</sup> Center for X-Mechanics, Key Laboratory of Soft Machines and Smart Devices of Zhejiang Province, School of Aeronautics and Astronautics, Zhejiang University, Hangzhou 310027, China

<sup>2</sup> College of Automation, Hangzhou Dianzi University, Hangzhou 310018, China

<sup>3</sup> School of Pharmacy, Hangzhou Normal University, Hangzhou 311121, China

<sup>4</sup> Key Laboratory of Elemene Class Anti-Cancer Chinese Medicines, Engineering Laboratory of Development and Application of Traditional Chinese Medicines, Collaborative Innovation Center of Traditional Chinese Medicines of Zhejiang Province, Hangzhou Normal University, Hangzhou 311121, China

<sup>5</sup> Key Laboratory of Surface & Interface Science of Polymer Materials of Zhejiang Province, Department of Chemistry, Zhejiang Sci-Tech University, Hangzhou 310018, China

<sup>6</sup> Department of Pharmacy, Hangzhou Third People's Hospital, Affiliated Hangzhou Dermatology Hospital, Zhejiang University School of Medicine, West Lake Road 38, Hangzhou 310009, China

\* Correspondence: lizhang@zstu.edu.cn (L.Z.); wangzi0209@zju.edu.cn (W.W.); shenjiawei@hznu.edu.cn (J.-W.S.); Tel: +86-571-2886-3425 (J.-W.S.)

† These authors contributed equally to this work.

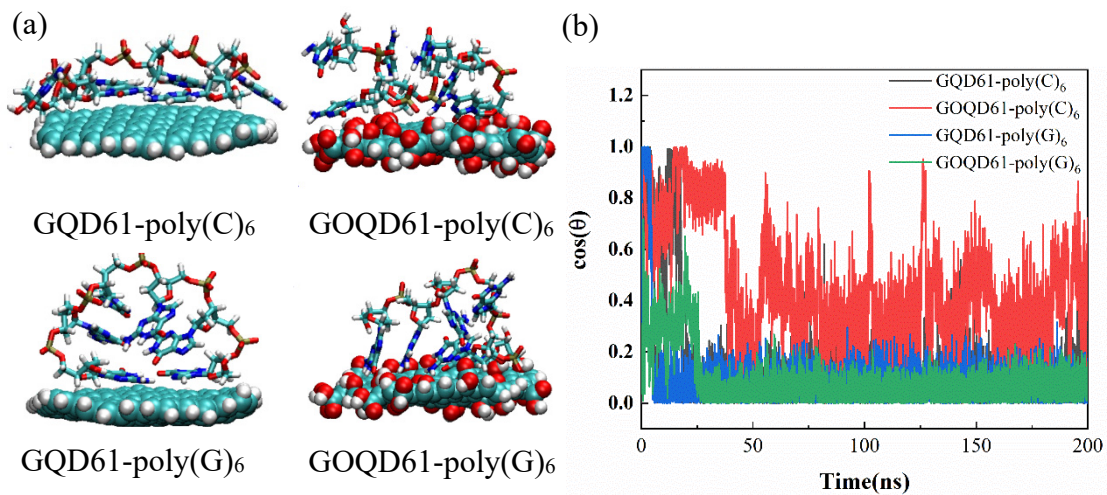

**Figure S1.** (a) The snapshot of ssDNA adsorbed on the surface of GQD61 and GOQD61 at the end of 200 ns MD simulation; (b) The angle between ssDNA axis and the normal of the GQD61 (GOQD61) surface as a function of simulation time.

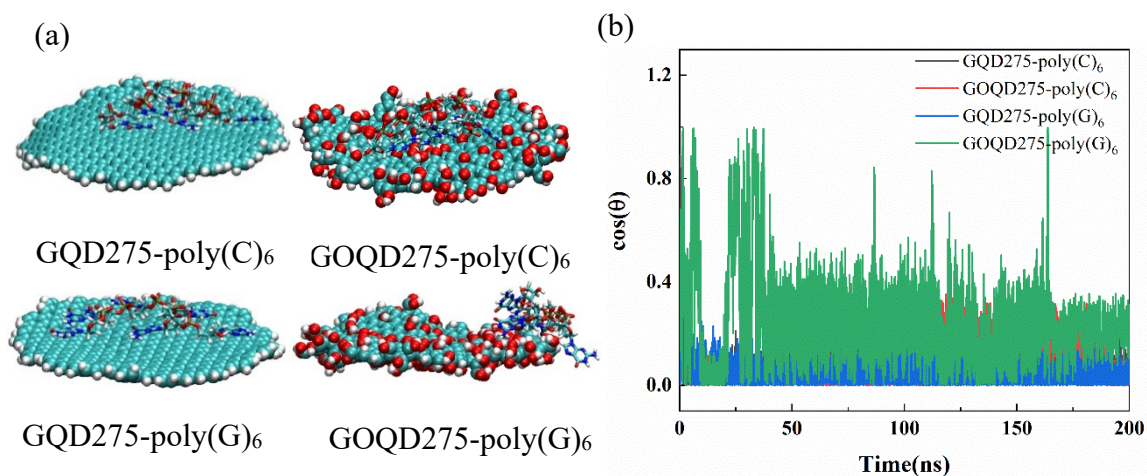

**Figure S2.** (a) The snapshot of ssDNA adsorbed on the surface of GQD275/GOQD275 at the end of 200 ns MD simulation; (b) The angle between ssDNA axis and the normal of GQD275/GOQD275 surface as a function of simulation time.

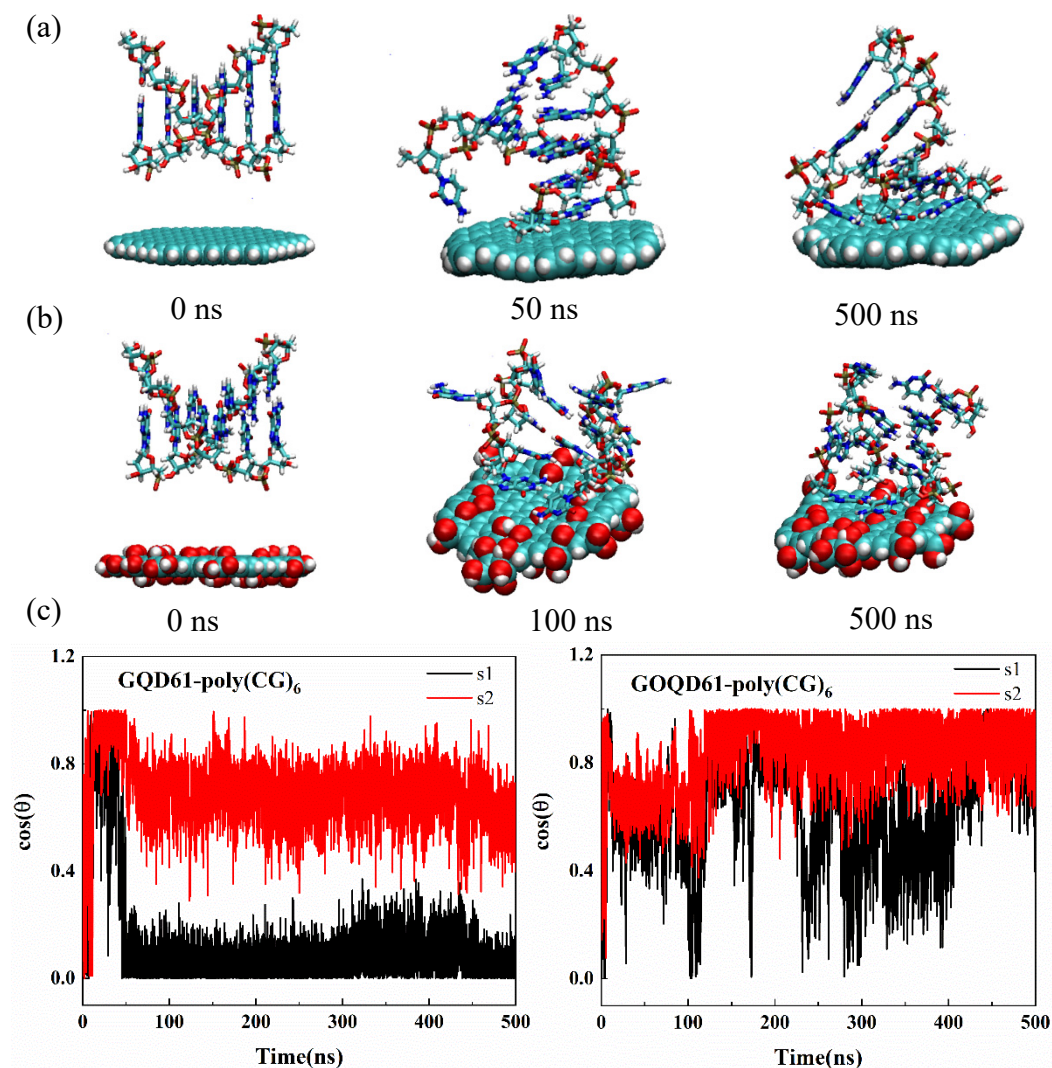

**Figure S3.** (a) The snapshot of dsDNA adsorbed on the surface of GQD61; (b) The snapshot of dsDNA adsorbed on the surface of GOQD61; (c) The angle between the axis of two single strands of dsDNA and the normal of the GQD61/GOQD61 surface as a function of simulation time.

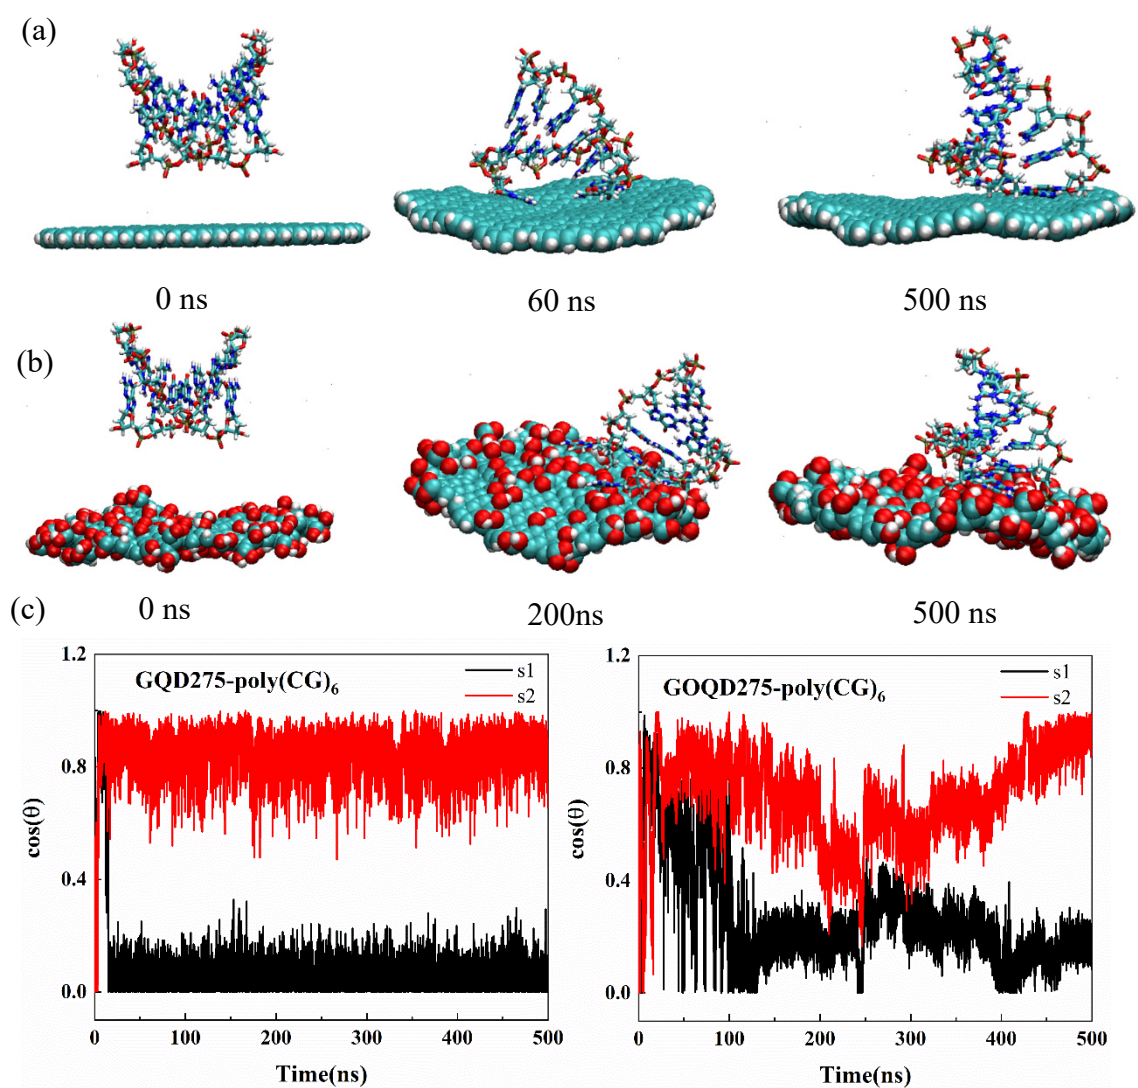

**Figure S4.** (a) The snapshot of dsDNA adsorbed on the surface of GQD275; (b) The snapshot of dsDNA adsorbed on the surface of GOQD275; (c) The angle between the axis of two single strands of dsDNA and the normal of the GQD275/GOQD275 surface as a function of simulation time.



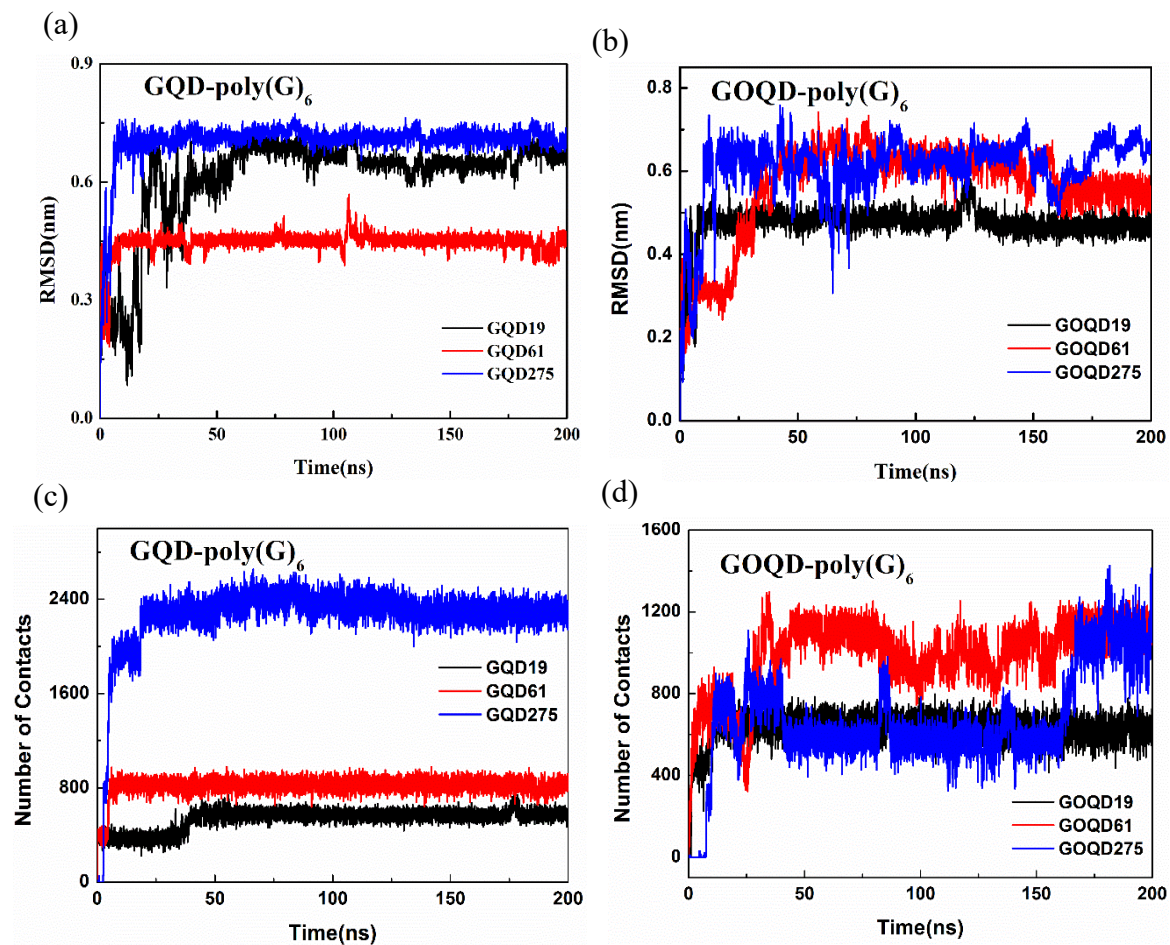

**Figure S5.** (a) The RMSD variation of poly(G)<sub>6</sub> during the adsorption process on GQD with different sizes; (b) The RMSD variation of poly(G)<sub>6</sub> during the adsorption process on GOQD with different sizes; (c) Number of contacts between poly(G)<sub>6</sub> and GQD versus the simulation time; (d) Number of contacts between poly(G)<sub>6</sub> and GOQD versus the simulation time.

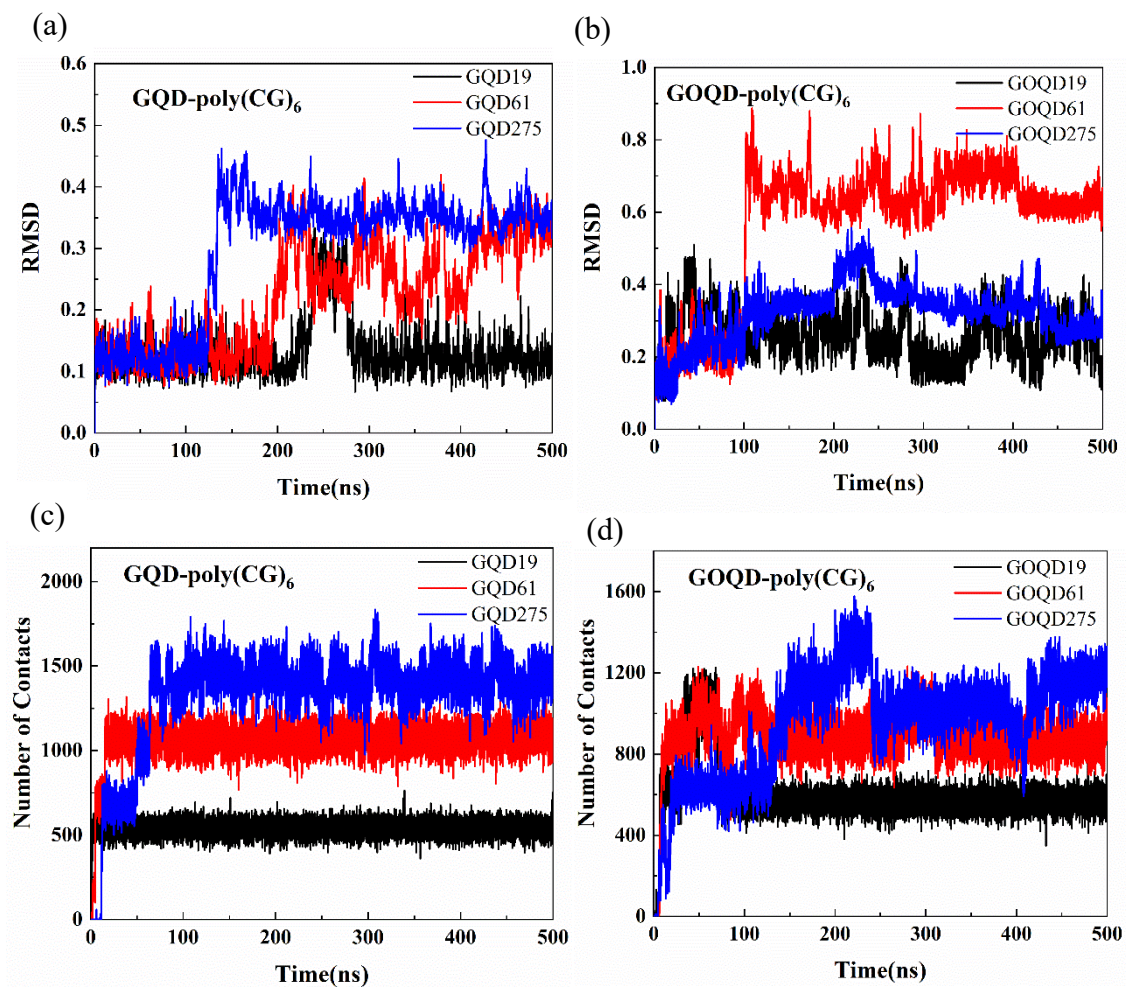

**Figure S6.** (a) The RMSD during the adsorption of dsDNA on the surface of GQD; (b) The RMSD during the adsorption of dsDNA on the surface of GOQD; (c) Number of contacts between dsDNA and GQD versus the simulation time; (d) Number of contact between dsDNA and GOQD versus the simulation time.
